# Supplementary material for: Macrophage Sphingosine 1-Phosphate Receptor 2 Blockade Attenuates Liver Inflammation and Fibrogenesis Triggered by NLRP3 Inflammasome
Source: PubMed Central journal article supplement (PMC7333785; doi:10.3389/fimmu.2020.01149), 2020-06-26
Supplement: Image_1.pdf [file Image_1.pdf]

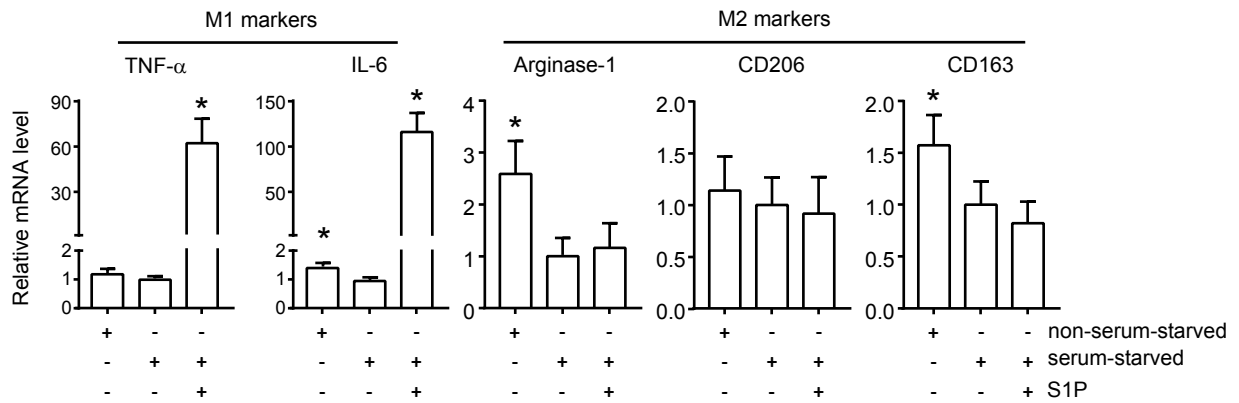

**Supplementary Figure 1. S1P induces BMMs polarized toward M1 type *in vitro*.** The mRNA expression of M1 markers (TNF- $\alpha$  and IL-6), and M2 markers (Arginase-1, CD206 and CD163) in BMMs treated with non-serum-starved, serum-starved or 1  $\mu$ mol/L S1P for 2 hours after serum-starvation. Data are presented as mean  $\pm$  SEM; n=6 per group; \* P<0.05 compared with serum-starved group.
